# Supplementary material for: Modulation of Optical and Electrical Characteristics by Laterally Stretching DNAs on CVD-Grown Monolayers of MoS2
Source: Hindawi journal article supplement (doi:10.1155/2017/2565703), 2017-01-01
Supplement: f1 [file 2565703.f1.docx]

Supplementary information

**Modulation of Optical and Electrical Characteristics by Laterally Stretching DNAs on MoS2 Monolayers**

**Guru P. Neupane,Minh Dao Tran, Hyun Kim and Jeongyong Kim**

Department of Energy Science, Sungkyunkwan University (SKKU), Suwon 440-746, Republic of Korea,

Correspondence should be addressed to Jeongyong Kim; j.kim@skku.edu

This Supplementary Information presents following contents:

1. PL spectral measurement and Raman spectra of 1L-MoS2 before and after the oxygen plasma treatment
2. Fluorescence images, and PL and Raman spectral measurements of less density of stretched DNA molecules distributed 1L-MoS2

**PL spectral measurement and Raman spectra of 1L-MoS2 before and after the oxygen plasma treatment**

FIGURE S1: (a) PL intensity maps of 1L-MoS2 before and after the oxygen plasma treatment (lower panel is before and upper panel is after the treatment) which was applied for DNA stretching. Scale bar indicates 10 µm. Averaged (b) PL spectra and (c) Raman spectra of 1L-MoS2 before and after the oxygen plasma treatment (black and red lines represent before and after treatment respectively). 514 nm laser line was used for the excitation of PL and Raman measurements.

**Fluorescence images, and PL and Raman spectral measurements of less density of stretched DNA molecules distributed 1L-MoS2**

Figure S2: (a) Epi-fluorescence image and (b) Bright field optical image of less density distribution of YOYO-1-stained DNA strands stretched on 1L-MoS2. (c) Comparison of PL spectrum and (d) Raman spectrum obtained from pristine 1L-MoS2 and DNA-stretched 1L-MoS2. Scale bars indicate 10 µm.
